# Supplementary material
Source: bioRxiv or medRxiv preprint supplement (https://medrxiv.org/highwire/filestream/90708/field_highwire_adjunct_files/0/2020.07.23.20160598-1.pdf)
Supplement: Supplementary file [file 2020.07.23.20160598-1.pdf]

# Shaballout et al. - Segmental Signs in Visceral Disease

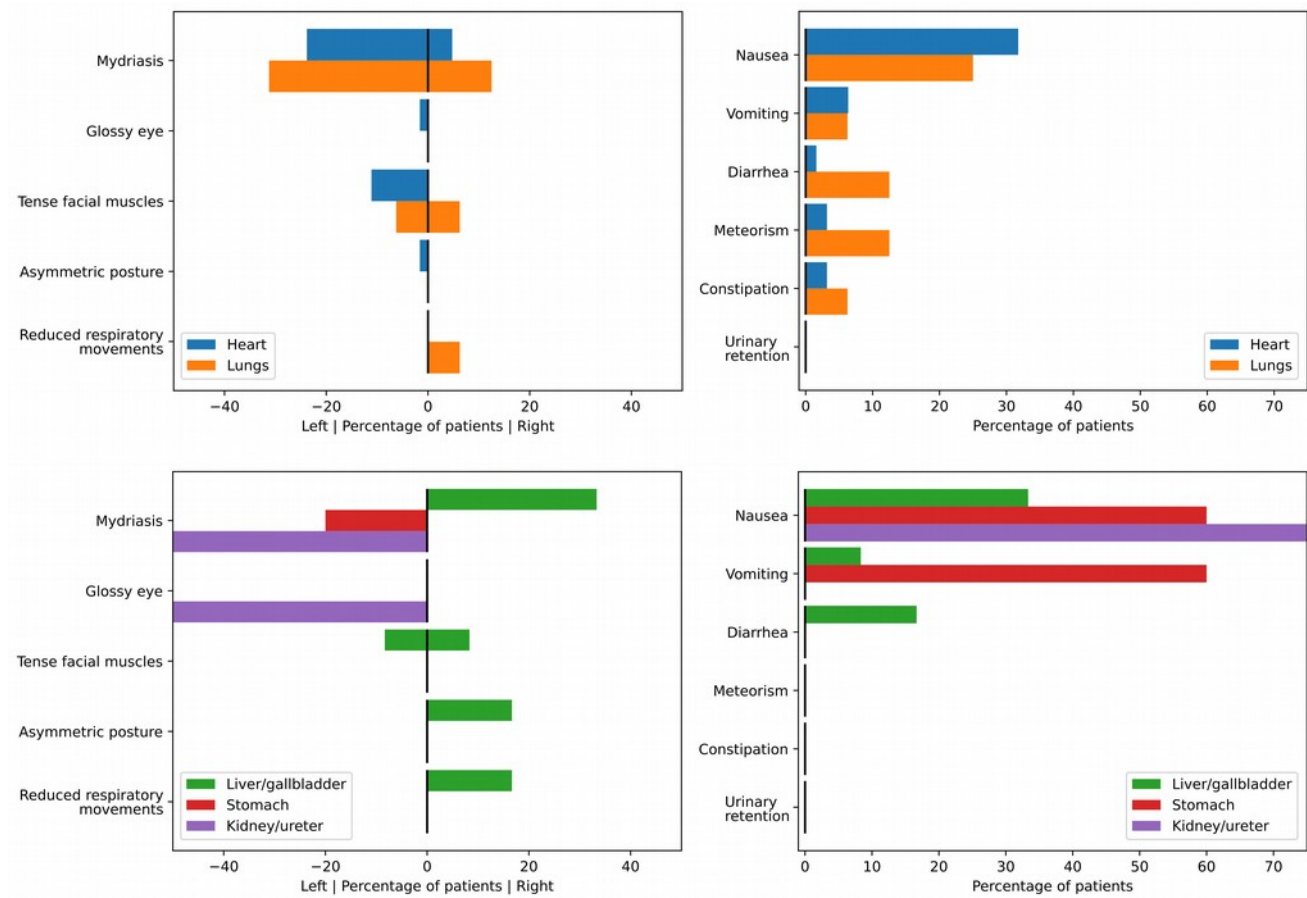

**Supplementary Figure 1.** Lateralization signs (left) and segmental symptoms (right) for chest organs (top) and abdominal organs (bottom).
